# Supplementary material
Source: PubMed Central journal article supplement (PMC3749293)
Supplement: NIHMS471002-supplement-01.pdf [file NIHMS471002-supplement-01.pdf]

## The 'One-Two Punch' of Alcoholism: Role of Central Amygdala Dynorphins / Kappa-Opioid Receptors

### Supplemental Information

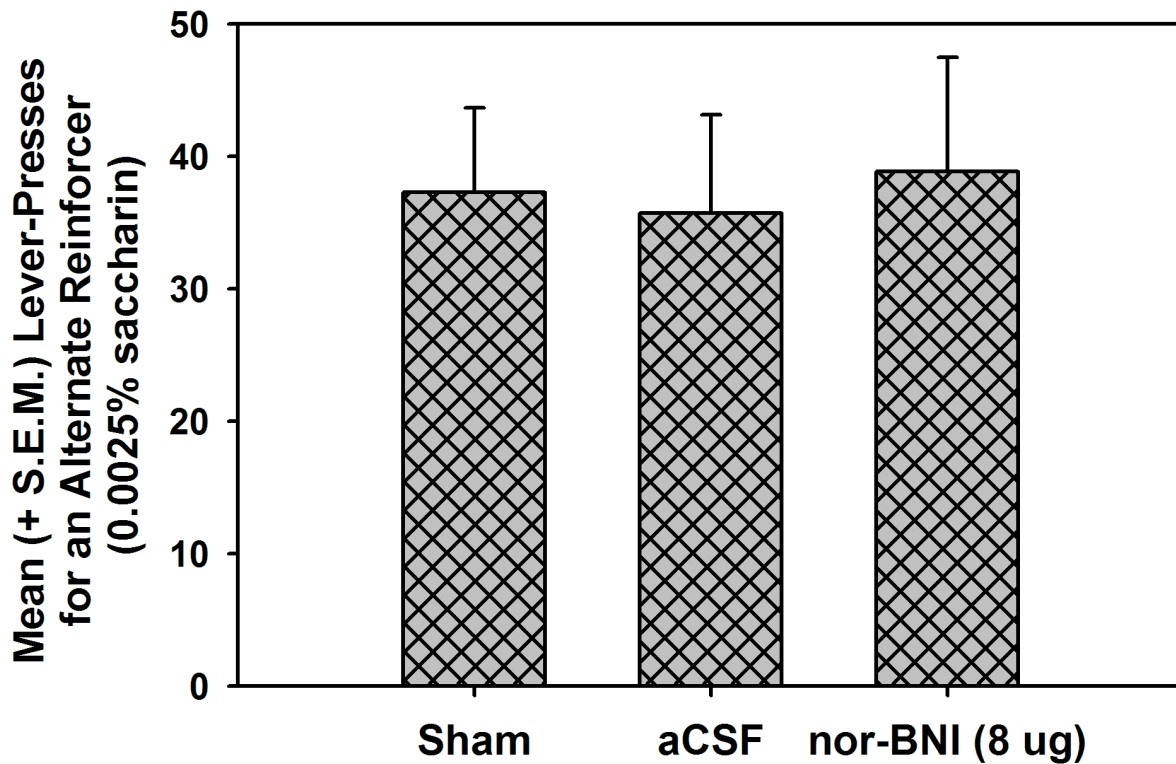

**Figure S1. Intra-CeA KOR Antagonism Does Not Affect Saccharin Self-Administration.** Nor-BNI infused into the CeA did not alter saccharin (0.0025%) self-administration in alcohol-naïve rats ( $F_{(1,6)} = 2.82, p < 0.05$ ). aCSF, artificial cerebrospinal fluid; CeA, central nucleus of the amygdala; KOR, kappa-opioid receptor; nor-BNI, nor-binaltorphimine.
